# Supplementary material
Source: PubMed Central journal article supplement (PMC3762943)
Supplement: NIHMS462248-supplement.pdf [file NIHMS462248-supplement.pdf]

## Supplementary Material

**Supplementary Table 1:** Characteristics of Subjects with WAGR Syndrome. Deletion boundaries were determined using oligonucleotide array comparative genomic hybridization (NCBI Build 36, hg 18). Subjects with deletion of all or any portion of the *BDNF* gene were designated as *BDNF*<sup>+/-</sup> (W1-W15, gray shading) while subjects with deletions that did not involve *BDNF* were designated as *BDNF*<sup>+/+</sup> (W16-W28, no shading). History of Wilms tumor, aniridia, and genitourinary (GU) anomalies were obtained from medical chart review.

| ID  | Age (y) | Sex | Deletion Size (Mb) | Telomeric Boundary | Centromeric Boundary | Wilms Tumor | Visual Acuity | GU Anomaly | Included in Han et al. 2008 | Included in Xu et al. 2008 |
|-----|---------|-----|--------------------|--------------------|----------------------|-------------|---------------|------------|-----------------------------|----------------------------|
| W1  | 22.6    | F   | 19.24              | 17,181,487         | 36,424,081           | yes         | 3             | yes        | no                          | no                         |
| W2  | 21.8    | M   | 21.62              | 18,782,898         | 40,400,884           | yes         | 7             | yes        | no                          | no                         |
| W3  | 9.5     | F   | 14.37              | 20,759,560         | 35,124,632           | no          | 4             | no         | yes                         | yes                        |
| W4  | 8.3     | F   | 11.21              | 22,437,763         | 33,647,959           | no          | 2             | no         | yes                         | no                         |
| W5  | 11.9    | F   | 18.82              | 23,887,358         | 42,707,993           | yes         | 4             | no         | yes                         | no                         |
| W6  | 6.5     | F   | 8.00               | 24,744,722         | 32,740,440           | no          | 3             | no         | no                          | no                         |
| W7  | 12.6    | M   | 11.45              | 24,748,424         | 36,203,063           | yes         | 3             | yes        | yes                         | yes                        |
| W8  | 16.7    | F   | 13.07              | 24,770,593         | 37,835,652           | yes         | 4             | yes        | yes                         | no                         |
| W9  | 10.3    | M   | 15.51              | 25,059,584         | 40,571,441           | yes         | 4             | yes        | no                          | no                         |
| W10 | 22.4    | F   | 10.71              | 25,330,891         | 36,039,207           | no          | 4             | yes        | yes                         | no                         |
| W11 | 8.0     | M   | 17.81              | 25,968,860         | 43,778,471           | yes         | 4             | yes        | yes                         | no                         |
| W12 | 20.3    | M   | 14.17              | 26,005,134         | 40,174,102           | no          | 7             | yes        | yes                         | yes                        |
| W13 | 6.2     | M   | 10.65              | 26,690,778         | 37,341,623           | yes         | 4             | yes        | yes                         | yes                        |
| W14 | 24.3    | F   | 9.90               | 27,057,396         | 36,959,349           | yes         | 5             | yes        | yes                         | yes                        |
| W15 | 28.3    | M   | 10.22              | 27,692,635         | 37,916,281           | yes         | 6             | yes        | yes                         | yes                        |
| W16 | 12.2    | M   | 6.23               | 27,773,897         | 33,998,994           | no          | 4             | yes        | yes                         | yes                        |
| W17 | 12.0    | F   | 14.80              | 27,824,678         | 42,622,913           | yes         | 6             | no         | no                          | no                         |
| W18 | 6.3     | M   | 4.62               | 28,200,894         | 32,820,697           | no          | 3             | yes        | yes                         | no                         |
| W19 | 6.1     | F   | 5.46               | 28,221,617         | 33,679,832           | no          | 4             | yes        | yes                         | yes                        |
| W20 | 6.1     | F   | 6.64               | 28,320,098         | 34,963,800           | yes         | 4             | no         | yes                         | yes                        |
| W21 | 13.6    | M   | 10.85              | 28,901,513         | 39,755,713           | no          | 4             | yes        | yes                         | no                         |
| W22 | 14.0    | F   | 4.90               | 29,555,113         | 34,459,864           | no          | 7             | no         | yes                         | yes                        |
| W23 | 16.1    | F   | 8.97               | 29,703,168         | 38,673,618           | yes         | 4             | yes        | yes                         | no                         |
| W24 | 27.1    | F   | 3.57               | 30,035,387         | 33,602,848           | yes         | 6             | no         | yes                         | no                         |
| W25 | 25.4    | F   | 6.84               | 30,232,199         | 37,070,116           | no          | 4             | yes        | yes                         | yes                        |
| W26 | 28.3    | F   | 13.47              | 30,861,844         | 44,329,536           | yes         | 3             | yes        | yes                         | yes                        |
| W27 | 7.1     | F   | 2.22               | 31,459,056         | 33,682,710           | yes         | 4             | no         | yes                         | no                         |
| W28 | 11.0    | M   | 6.81               | 32,380,218         | 39,188,328           | yes         | 2             | yes        | no                          | yes                        |

**Supplementary Table 2: DSM-IV TR Criteria for Autism – Modified for Individuals with Significant Visual Impairment**

|                                                                                                                                                                                             |                                                                                                                                                                                                                                                              |
|---------------------------------------------------------------------------------------------------------------------------------------------------------------------------------------------|--------------------------------------------------------------------------------------------------------------------------------------------------------------------------------------------------------------------------------------------------------------|
| <b>1. QUALITATIVE IMPAIRMENTS IN RECIPROCAL SOCIAL INTERACTION</b>                                                                                                                          |                                                                                                                                                                                                                                                              |
| <b>1a. Marked impairment in use of multiple nonverbal behaviors to regulate social interaction</b>                                                                                          |                                                                                                                                                                                                                                                              |
| I.                                                                                                                                                                                          | Consider level and duration of visual impairment in regard to the development and meaningful use of eye contact, gestures, and facial expressions.                                                                                                           |
| <b>1b. Failure to develop peer relationships appropriate to developmental level</b>                                                                                                         |                                                                                                                                                                                                                                                              |
| <b>1c. Lack of spontaneous seeking to share enjoyment, interests, achievements with others</b>                                                                                              |                                                                                                                                                                                                                                                              |
| I.                                                                                                                                                                                          | Consider level and duration of visual impairment, as skills such as pointing may not be meaningful for some individuals.                                                                                                                                     |
| <b>1d. Lack of social or emotional reciprocity</b>                                                                                                                                          |                                                                                                                                                                                                                                                              |
| I.                                                                                                                                                                                          | Consider level and duration of visual impairment in regard to comfort with unfamiliar individuals in new environments.                                                                                                                                       |
| <b>2. QUALITATIVE IMPAIRMENTS IN COMMUNICATION</b>                                                                                                                                          |                                                                                                                                                                                                                                                              |
| <b>2a. Delay in, or total lack of, the development of spoken language (not accompanied by an attempt to compensate through alternative modes of communication such as gestures or mime)</b> |                                                                                                                                                                                                                                                              |
| I.                                                                                                                                                                                          | Consider the level and duration of visual impairment in regard to expectation of “alternative modes of communication.” For example, development of sign language/gesture is likely much less meaningful to someone with visual impairment.                   |
| <b>2b. In individuals with adequate speech, marked impairment in the ability to initiate or sustain conversation</b>                                                                        |                                                                                                                                                                                                                                                              |
| <b>2c. Stereotyped &amp; repetitive use of language or idiosyncratic</b>                                                                                                                    |                                                                                                                                                                                                                                                              |
| <b>2d. Lack of varied, spontaneous make-believe play or social imitative play appropriate to developmental level</b>                                                                        |                                                                                                                                                                                                                                                              |
| I.                                                                                                                                                                                          | Consider level and duration of visual impairment in regard to expectations for play associated with three dimensional objects. For example, using a doll as an agent of action has limited meaning when the objects are not fully visible to the individual. |
| <b>3. RESTRICTED, REPETITIVE &amp; STEREOTYPED PATTERNS OF BEHAVIOR, INTERESTS &amp; ACTIVITIES</b>                                                                                         |                                                                                                                                                                                                                                                              |
| <b>3a. Encompassing preoccupation with one or more stereotyped patterns of interest that is abnormal either in intensity or focus</b>                                                       |                                                                                                                                                                                                                                                              |
| <b>3b. Apparently inflexible adherence to specific, nonfunctional routines or rituals</b>                                                                                                   |                                                                                                                                                                                                                                                              |
| I.                                                                                                                                                                                          | Consider the how adaptive the “nonfunctional routine or ritual” is based on the individual’s visual impairment (i.e., traveling in the same path every time the person walks through their house.).                                                          |
| <b>3c. Stereotyped and repetitive motor mannerisms</b>                                                                                                                                      |                                                                                                                                                                                                                                                              |
| <b>3d. Persistent preoccupation with parts of objects</b>                                                                                                                                   |                                                                                                                                                                                                                                                              |

**Supplementary Table 3: Characteristics of Subjects with Isolated Aniridia**

| <b>ID</b> | <b>Age (y)</b> | <b>Sex</b> | <b>PAX6 Genotype</b>                                                                                                      | <b>Visual Acuity Score</b> |
|-----------|----------------|------------|---------------------------------------------------------------------------------------------------------------------------|----------------------------|
| A1        | 7.3            | F          | heterozygous single base pair deletion in exon 7 (G161VfsX46, amino acid substitution, frame-shift, premature stop-codon) | 4                          |
| A2        | 8.3            | M          | heterozygous W266X (premature stop-codon in exon 10)                                                                      | 3                          |
| A3        | 17.5           | M          | heterozygous T>A substitution in intron 2 (predicted to alter splicing)                                                   | 2                          |
| A4        | 23.4           | F          | heterozygous Q2X (premature stop-codon)                                                                                   | 4                          |
| A5        | 28.3           | F          | heterozygous deletion of exons 1-4                                                                                        | 5                          |
| A6        | 29.6           | F          | heterozygous deletion of exons 6-7                                                                                        | 6                          |
| A7        | 32.3           | F          | heterozygous deletion of exons 8-13                                                                                       | 3                          |
| A8        | 33.0           | M          | heterozygous R240X (premature stop-codon in exon 9, homeobox domain).                                                     | 3                          |
| A9        | 33.4           | M          | heterozygous deletion of exons 6-7                                                                                        | 7                          |
| A10       | 39.3           | M          | heterozygous R38W (missense mutation in paired box domain)                                                                | 3                          |
| A11       | 40.5           | F          | heterozygous R240X (premature stop-codon in exon 9, homeobox domain)                                                      | 4                          |
| A12       | 54.0           | M          | heterozygous E107X (premature stop-codon)                                                                                 | 4                          |

**Supplementary Table 4:** Structural Brain Abnormalities Detected by MRI in Subjects with WAGR/11p Deletion Syndrome

| ID  | Age (y) | Sex | Deletion Size (Mb) | Telomeric Boundary | Centromeric Boundary | Hypoplastic Corpus Callosum | Grey Matter Heterotopia | Enlarged Ventricles |
|-----|---------|-----|--------------------|--------------------|----------------------|-----------------------------|-------------------------|---------------------|
| W1  | 22.6    | F   | 19.24              | 17,181,487         | 36,424,081           | no                          | no                      | no                  |
| W2  | 21.8    | M   | 21.62              | 18,782,898         | 40,400,884           | yes                         | no                      | no                  |
| W3  | 9.5     | F   | 14.37              | 20,759,560         | 35,124,632           | no                          | no                      | no                  |
| W4  | 8.3     | F   | 11.21              | 22,437,763         | 33,647,959           | no                          | no                      | no                  |
| W5  | 11.9    | F   | 18.82              | 23,887,358         | 42,707,993           | yes                         | no                      | no                  |
| W6  | 6.5     | F   | 8.00               | 24,744,722         | 32,740,440           | yes                         | no                      | no                  |
| W7  | 12.6    | M   | 11.45              | 24,748,424         | 36,203,063           | no                          | no                      | no                  |
| W8  | 16.7    | F   | 13.07              | 24,770,593         | 37,835,652           | no                          | no                      | no                  |
| W9  | 10.3    | M   | 15.51              | 25,059,584         | 40,571,441           | no                          | no                      | no                  |
| W10 | 22.4    | F   | 10.71              | 25,330,891         | 36,039,207           | no MRI                      | no MRI                  | no MRI              |
| W11 | 8.0     | M   | 17.81              | 25,968,860         | 43,778,471           | no                          | no                      | no                  |
| W12 | 20.3    | M   | 14.17              | 26,005,134         | 40,174,102           | no                          | no                      | no                  |
| W13 | 6.2     | M   | 10.65              | 26,690,778         | 37,341,623           | yes                         | no                      | yes                 |
| W14 | 24.3    | F   | 9.90               | 27,057,396         | 36,959,349           | no                          | yes                     | yes                 |
| W15 | 28.3    | M   | 10.22              | 27,692,635         | 37,916,281           | no MRI                      | no MRI                  | no MRI              |
| W16 | 12.2    | M   | 6.23               | 27,773,897         | 33,998,994           | yes                         | no                      | no                  |
| W17 | 12.0    | F   | 14.80              | 27,824,678         | 42,622,913           | no                          | no                      | no                  |
| W18 | 6.3     | M   | 4.62               | 28,200,894         | 32,820,697           | no                          | no                      | no                  |
| W19 | 6.1     | F   | 5.46               | 28,221,617         | 33,679,832           | no                          | no                      | no                  |
| W20 | 6.1     | F   | 6.64               | 28,320,098         | 34,963,800           | yes                         | no                      | no                  |
| W21 | 13.6    | M   | 10.85              | 28,901,513         | 39,755,713           | yes                         | no                      | no                  |
| W22 | 14.0    | F   | 4.90               | 29,555,113         | 34,459,864           | no                          | no                      | no                  |
| W23 | 16.1    | F   | 8.97               | 29,703,168         | 38,673,618           | no                          | no                      | no                  |
| W24 | 27.1    | F   | 3.57               | 30,035,387         | 33,602,848           | no                          | no                      | no                  |
| W25 | 25.4    | F   | 6.84               | 30,232,199         | 37,070,116           | no                          | no                      | no                  |
| W26 | 28.3    | F   | 13.47              | 30,861,844         | 44,329,536           | no                          | no                      | no                  |
| W27 | 7.1     | F   | 2.22               | 31,459,056         | 33,682,710           | yes                         | yes                     | no                  |
| W28 | 11.0    | M   | 6.81               | 32,380,218         | 39,188,328           | no                          | no                      | yes                 |
